# Supplementary material for: Green Design, Synthesis, and Molecular Docking Study of Novel Quinoxaline Derivatives with Insecticidal Potential against Aphis craccivora
Source: PubMed Central journal article supplement — ACS Omega. 2022 Jul 27;7(31):27674–89. doi: 10.1021/acsomega.2c03332 (PMC9366785; doi:10.1021/acsomega.2c03332), 2022-07-27
Supplement: ao2c03332_si_001.pdf [file ao2c03332_si_001.pdf]

## Supporting Information

### Green Design, Synthesis, and Molecular Docking Study of Novel Quinoxaline Derivatives with Insecticidal Potential against *Aphis Craccivora*

Mariam Azzam Alanazi<sup>a</sup>, Wael A.A. Arafa<sup>a,b</sup>, Ibrahim O. Althobaiti<sup>c</sup>, Hamud A. Altaleb<sup>d</sup>, Rania B. Bakr<sup>e</sup>, Nadia A. A. Elkanzi<sup>a,f\*</sup>

<sup>a</sup> Chemistry Department, College of Science, Jouf University, P.O. Box: 2014, Sakaka, Saudi Arabia

<sup>b</sup> Chemistry Department, Faculty of Science, Fayoum University, P.O. Box 63514, Fayoum, Egypt.

<sup>c</sup> Department of Chemistry, College of Science and Arts, Jouf University, Saudi Arabia

<sup>d</sup> Department of Chemistry, Faculty of Science, Islamic University of Madinah

<sup>e</sup> Department of Pharmaceutical Organic Chemistry, Faculty of Pharmacy, Beni-Suef University, Beni-Suef 62514, Egypt.

<sup>f</sup> Chemistry Department, Faculty of Science, Aswan University, P.O. Box: 81528, Aswan, Egypt.

#### Corresponding author:

\* Nadia A.A.Elkanzi &E-mail: [nahasan@ju.edu.sa](mailto:nahasan@ju.edu.sa) & [kanzi20@yahoo.com](mailto:kanzi20@yahoo.com)

## Spectra data of Compounds

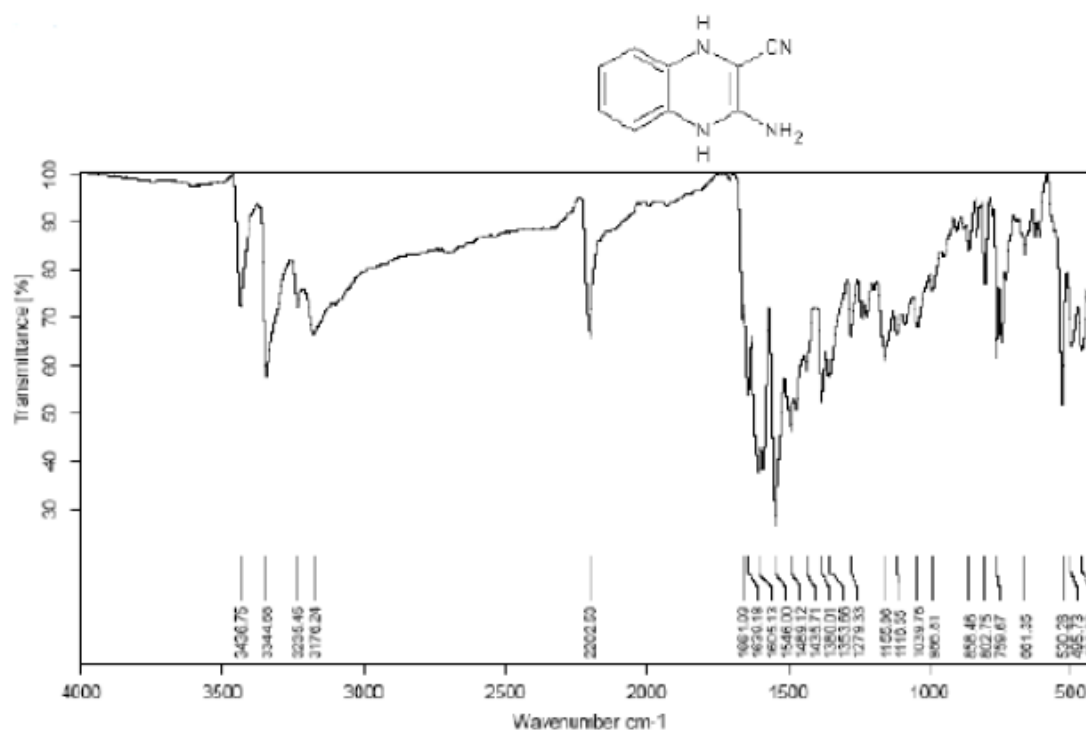

Figure S1: IR spectrum of compound 1.

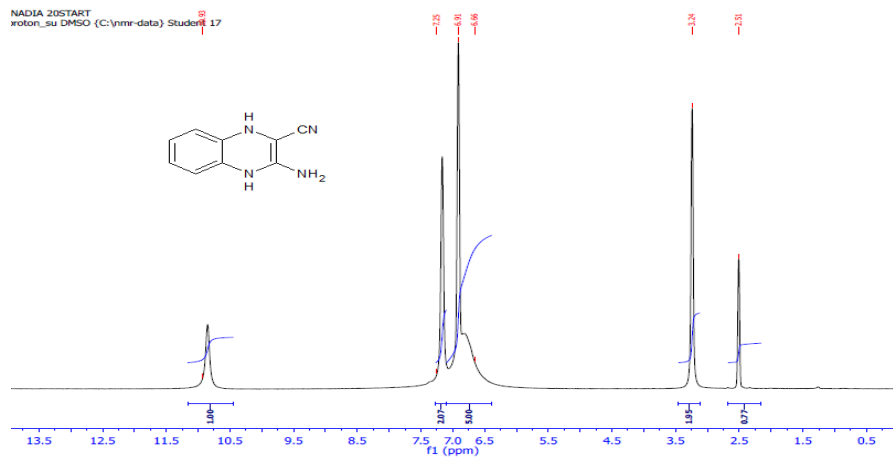

**Figure S2:**  $^1\text{H}$  NMR spectrum for compound **1** in  $\text{DMSO-}d_6$ .

START  
D2O  
proton\_su DMSO (C:\nmr-data) student 23

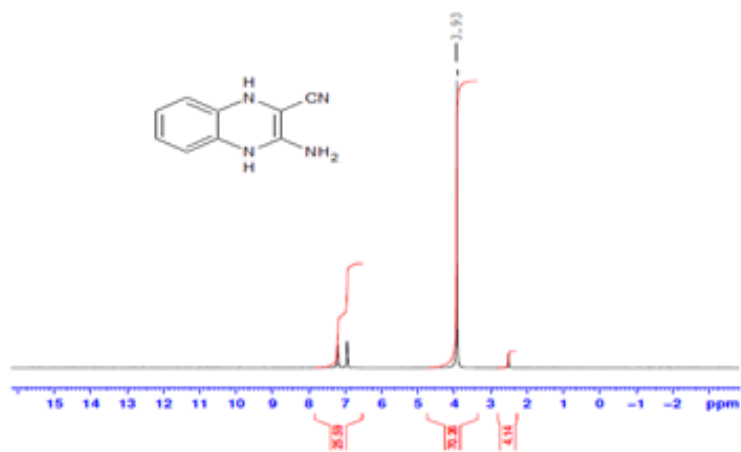

```
Current Data Parameters
NAME      0611-2011
EXPNO    1
PROCNO   1
F2 - Acquisition Parameters
Date_    20111111
Time     10.41
PULPROG  zgpg30
PCPDPRG  3 no phase flip
TO       400
SOLVENT  DMSO
NS       2
DS       4
SWH      8012.820 Hz
FIDRES   0.142424 Hz
AQ       4.0044442 sec
RG       170.04
WDW      EM
SSB      0
LB       0.30 Hz
GB       0
PC       1.0000000 Hz
SFO      400.1364112 MHz
AQ       4.0044442 sec
RG       170.04
WDW      EM
SSB      0
LB       0.30 Hz
GB       0
PC       1.00
```

Figure S3:  $^1\text{H}$  NMR spectrum (deuteration) for compound **1** in  $\text{DMSO-}d_6$ .

NADIA 20Th-P-B  
c13\_su DMSO (C:\nmr-data) Student 18

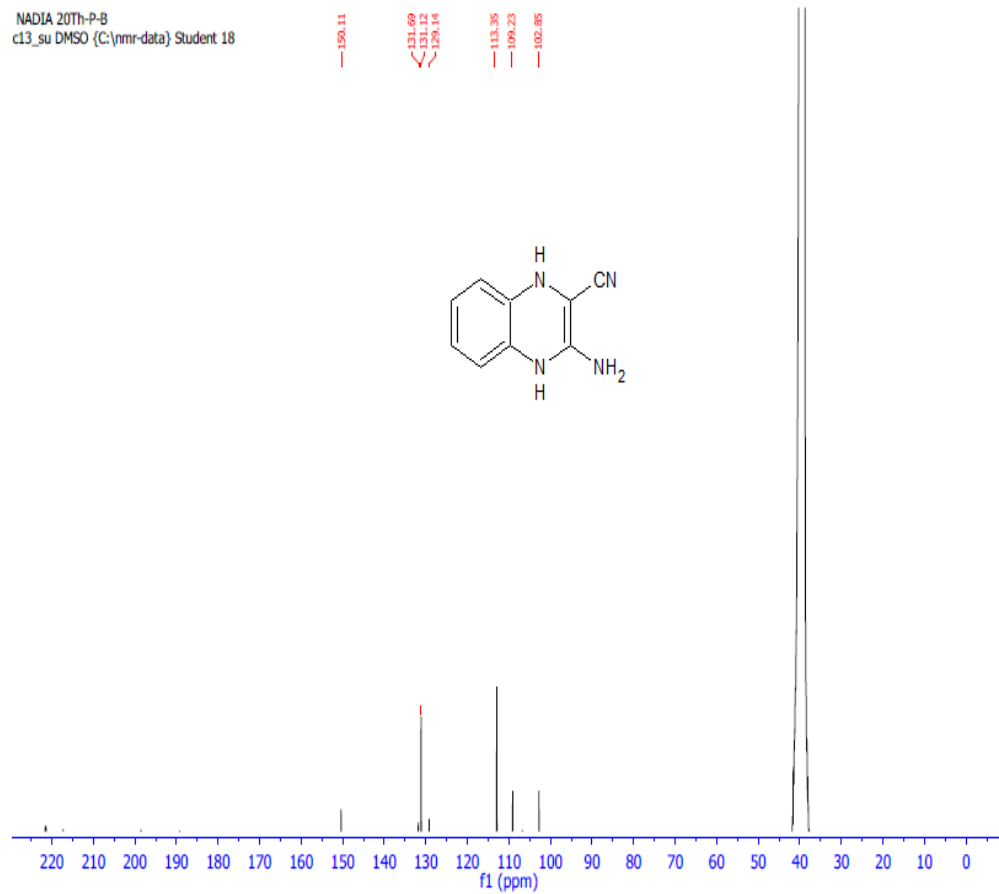

**Figure S4:**  $^{13}\text{C}$  NMR spectrum of compound **1** in  $\text{DMSO-}d_6$ .

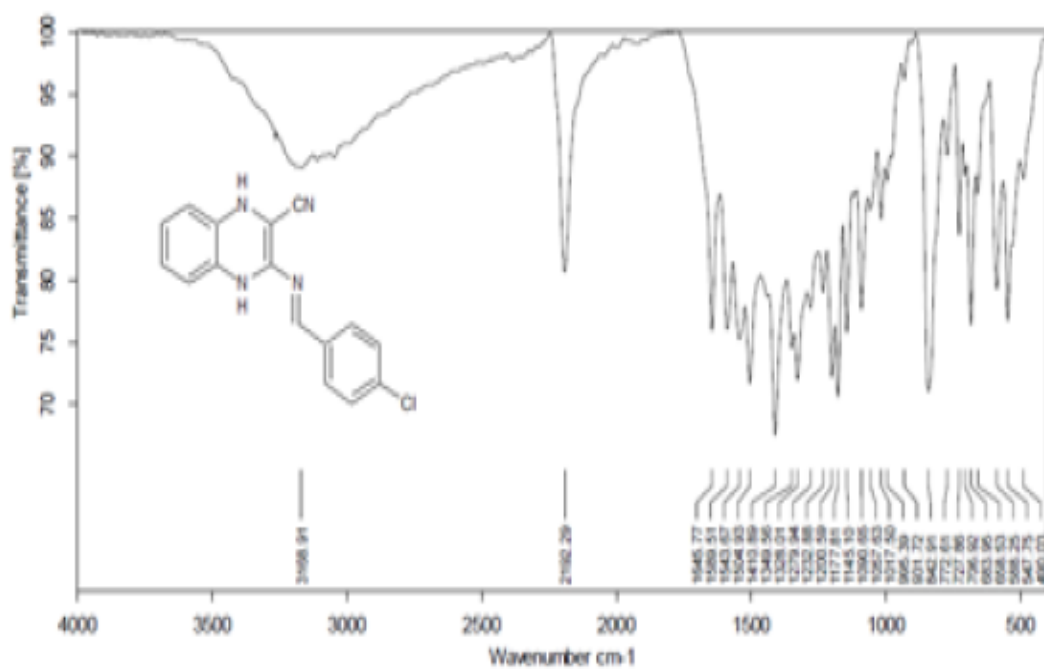

**Figure S5:** IR spectrum of compound **9**

NADIA 20M-1  
proton\_su DMSO (C:\nmr-data) Student 22

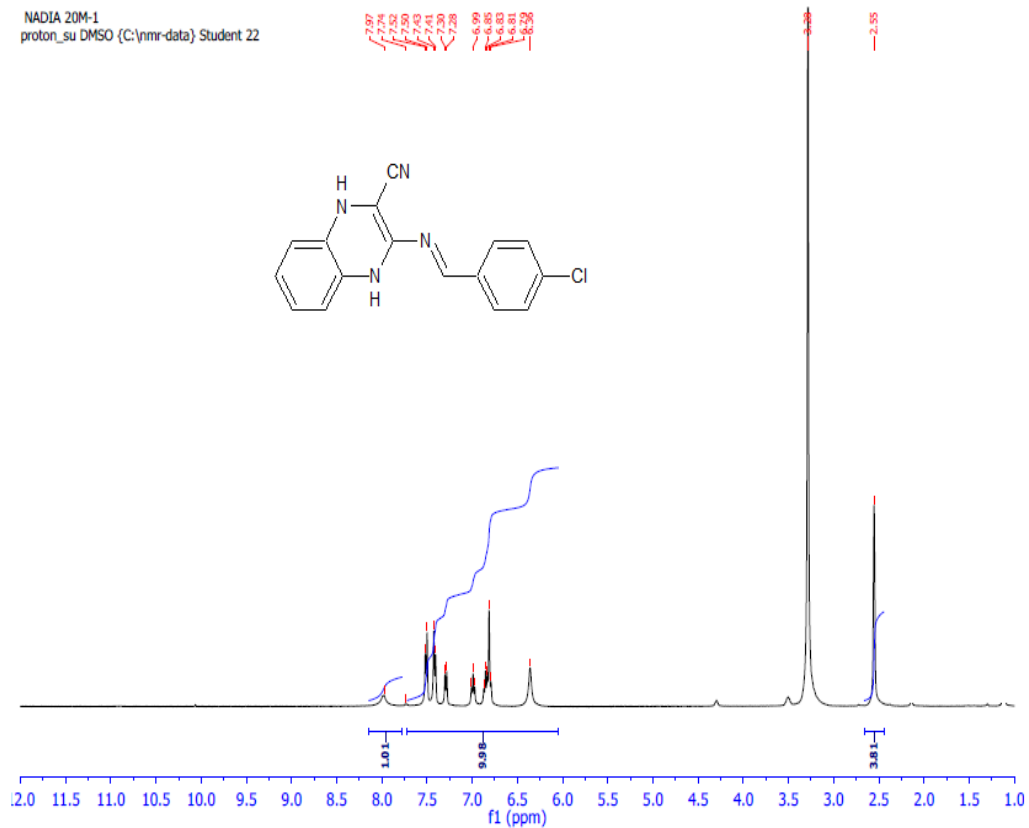

**Figure S6:** <sup>1</sup>H NMR spectrum of compound 9

NADIA 20TH-O-B  
c13\_su DMSO (C:\nmr-data) Student 17

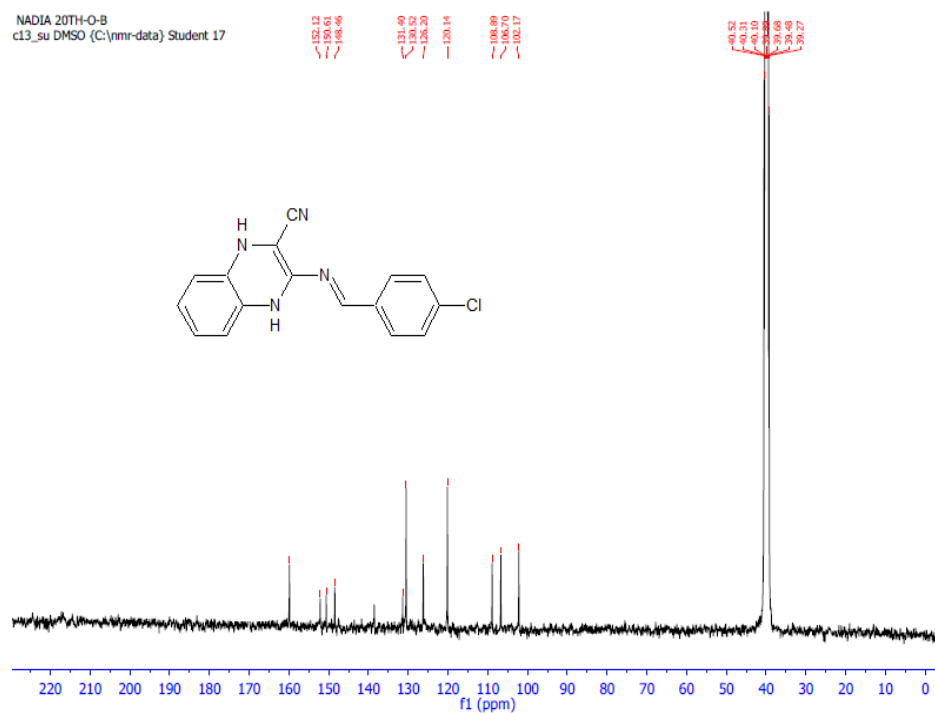

**Figure S7:**  $^{13}\text{C}$ NMR spectrum of compound **9**



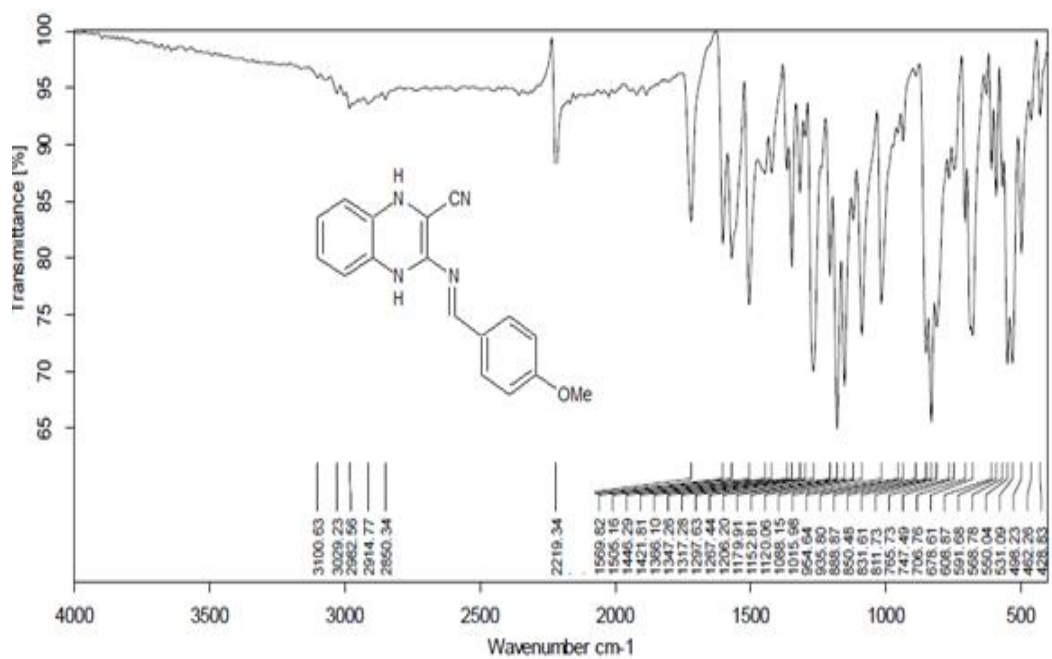

Figure S8: IR spectrum of compound 12.

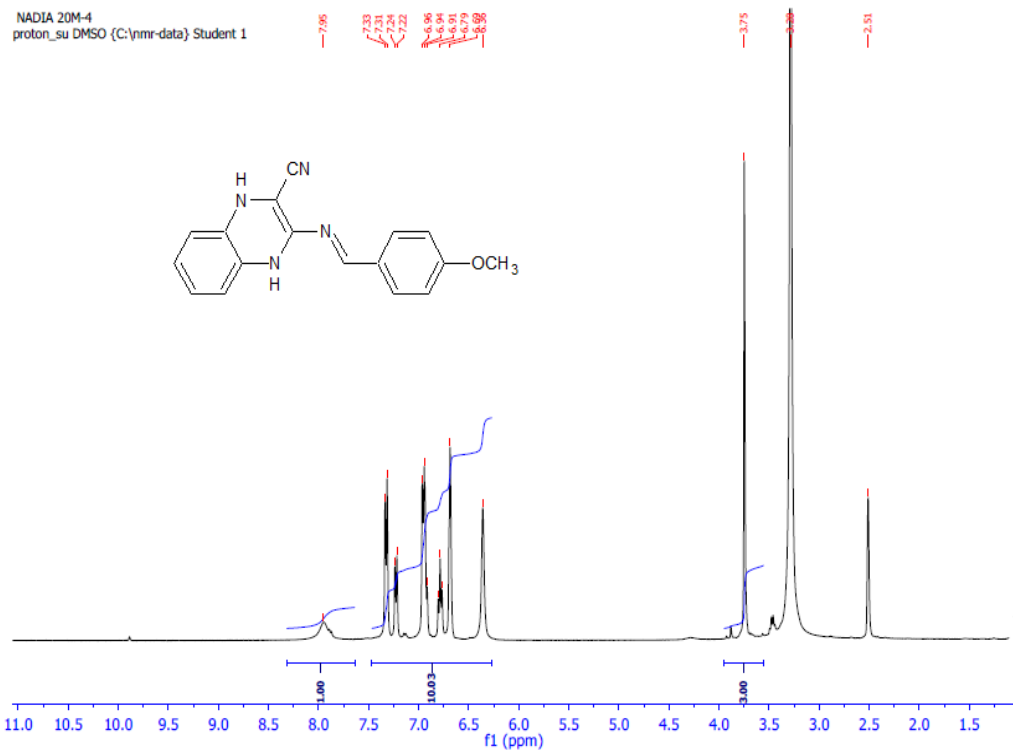

**Figure S9:**  $^1\text{H}$ NMR spectrum of compound 12

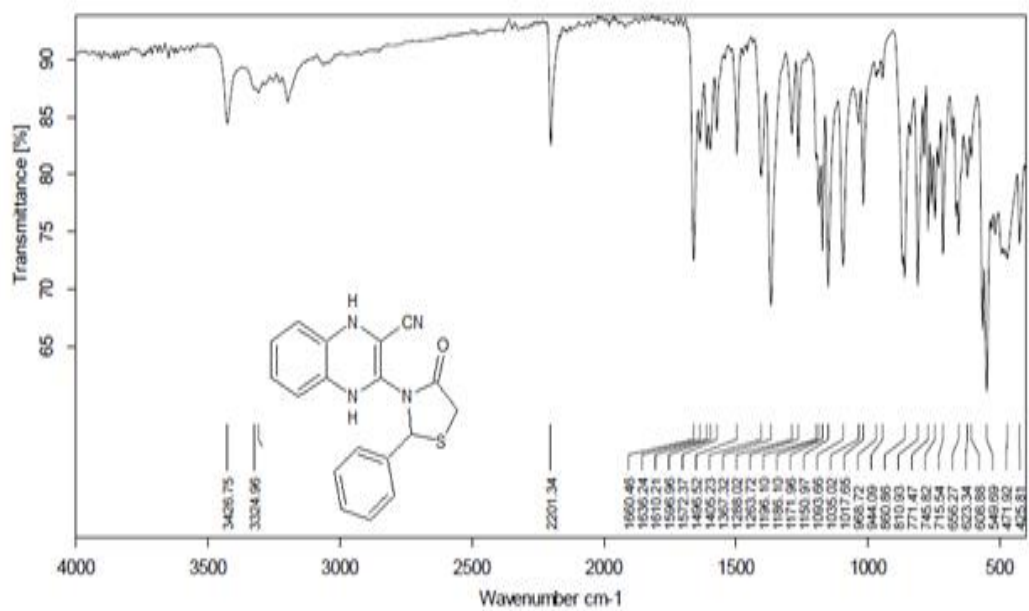

**Figure S10:** IR spectrum of compound **15**

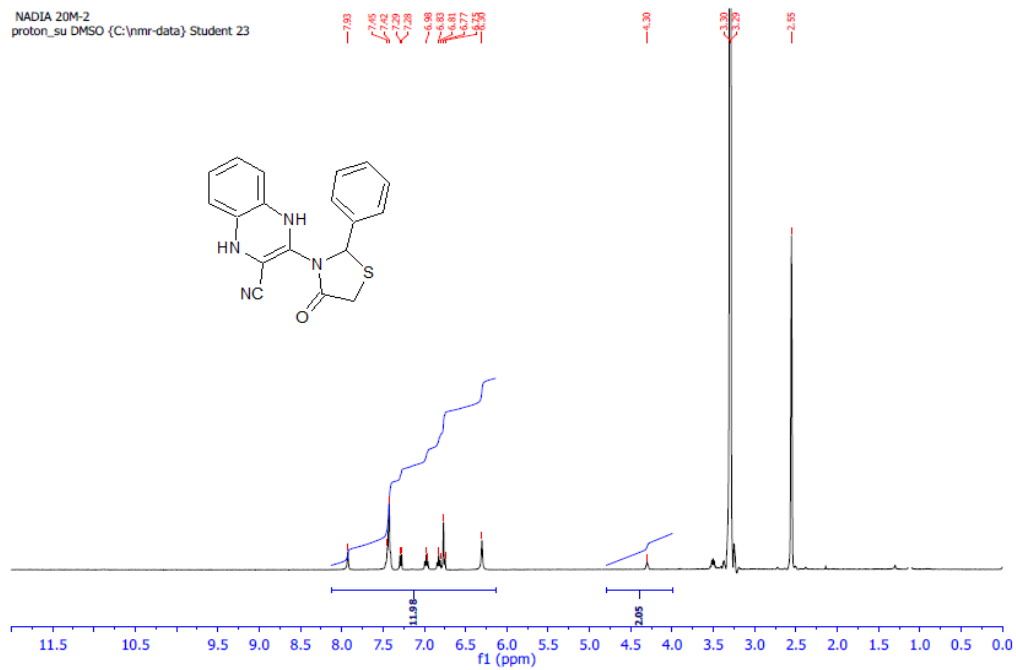

**Figure S11:**  $^1\text{H}$ NMR spectrum of compound **15**

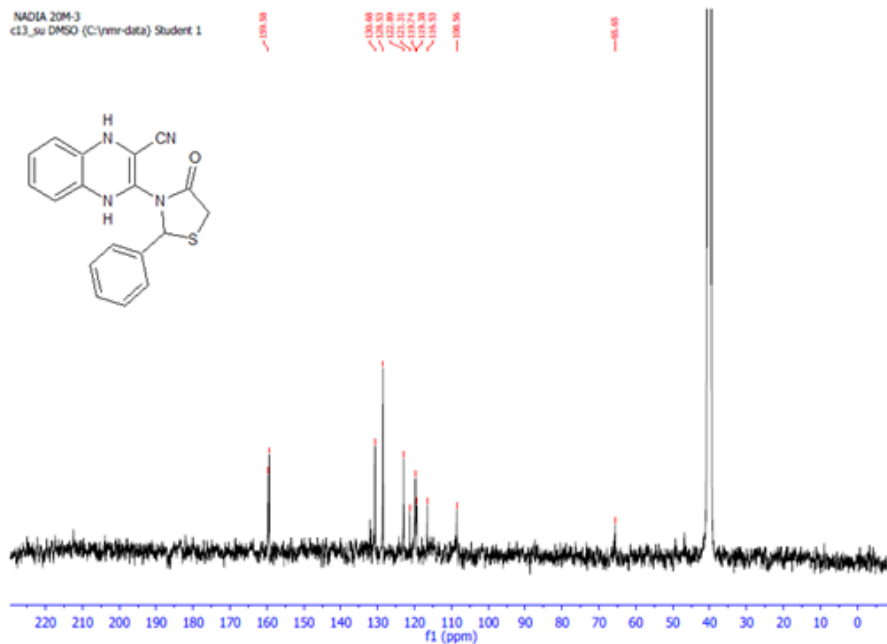

**Figure S12:**  $^{13}\text{C}$ NMR of compound **15**

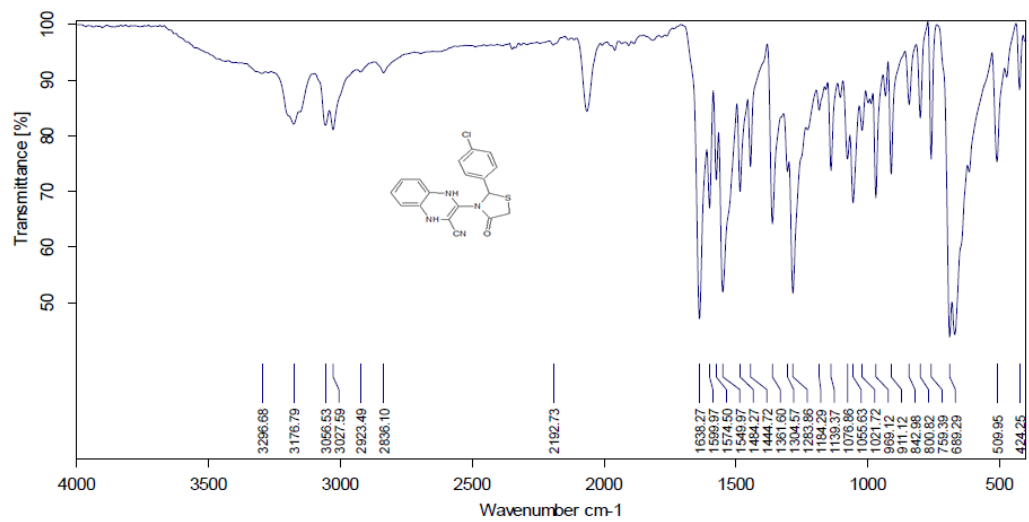

**Figure S13:** IR spectrum of compound **16**

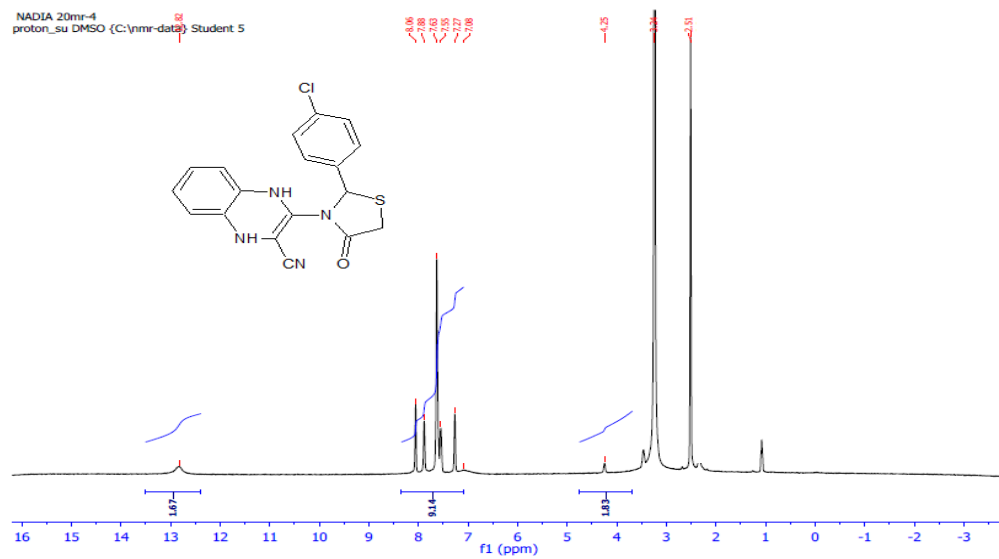

**Figure S14:**  $^1\text{H}$ NMR spectrum of compound **16**

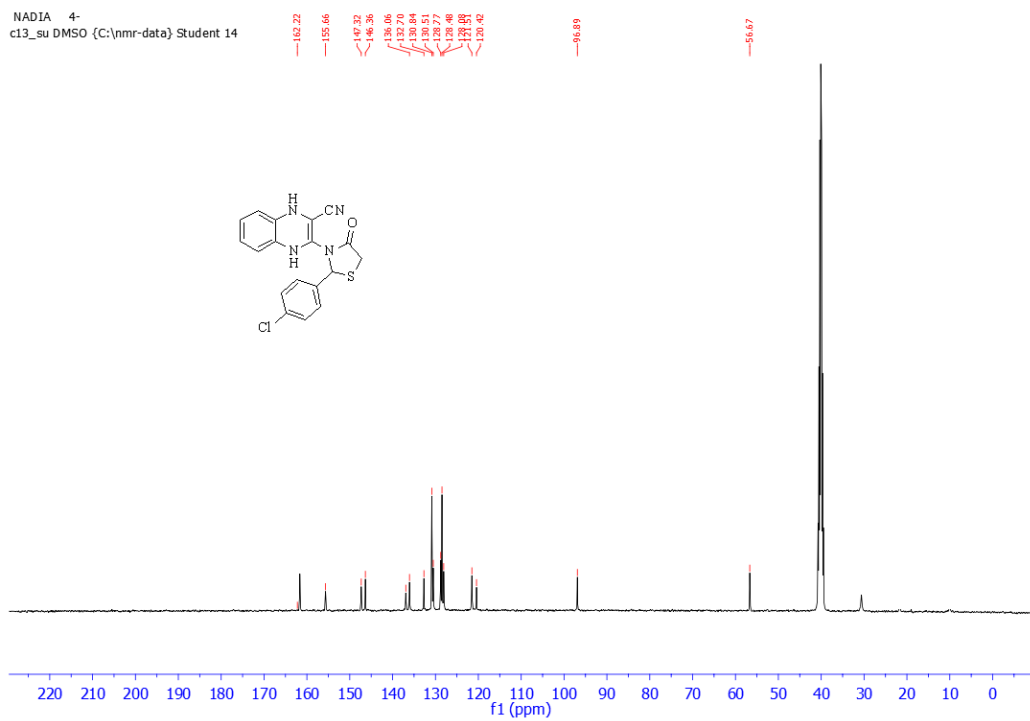

**Figure S15:**  $^{13}\text{C}$ NMR spectrum of compound 16



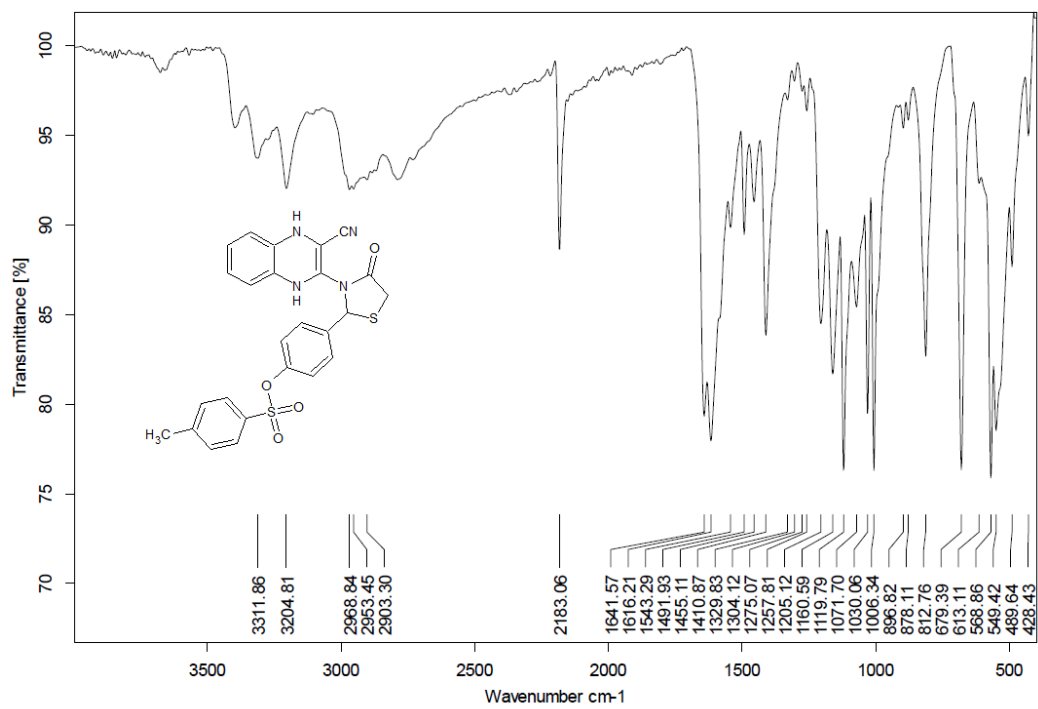

**Figure S16:** IR spectrum of compound 20

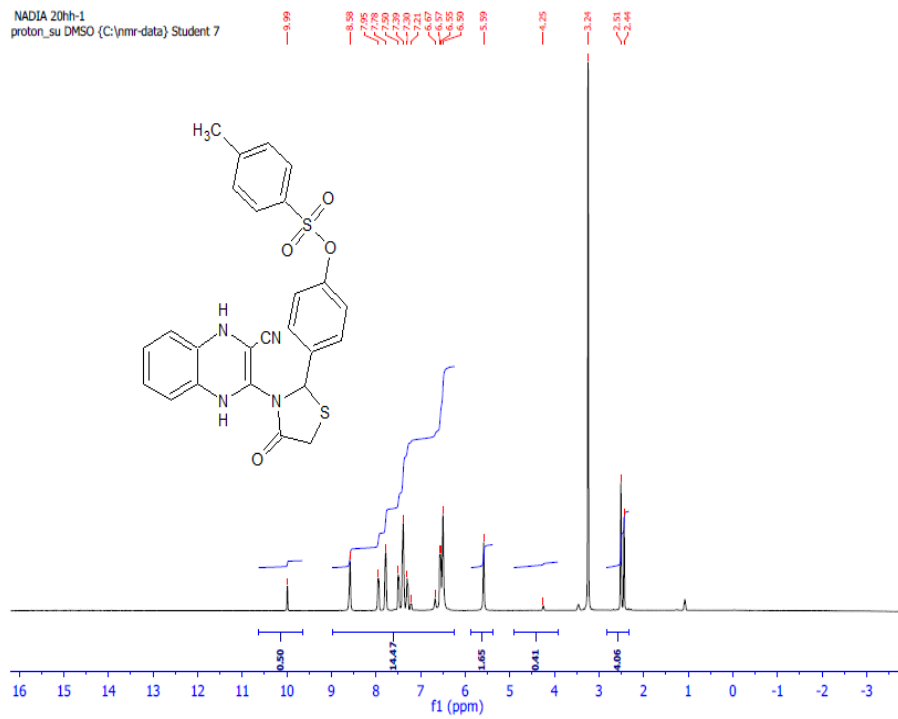

**Figure S17:**  $^1\text{H}$ NMR spectrum of compound **20**

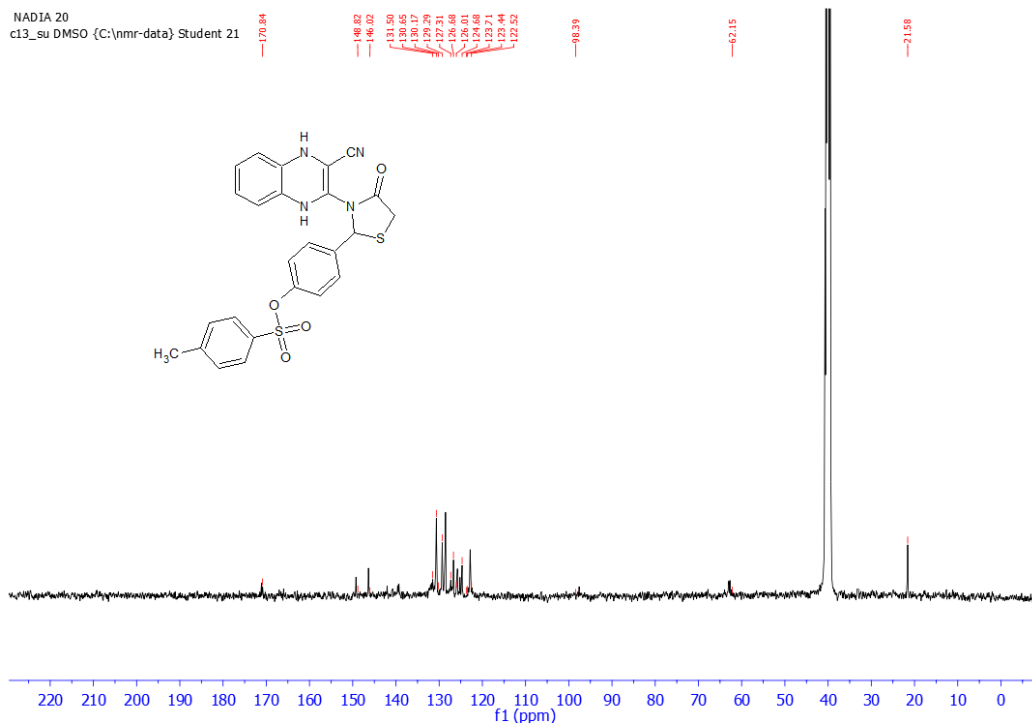

**Figure S18:**  $^{13}\text{C}$ NMR spectrum of compound 20



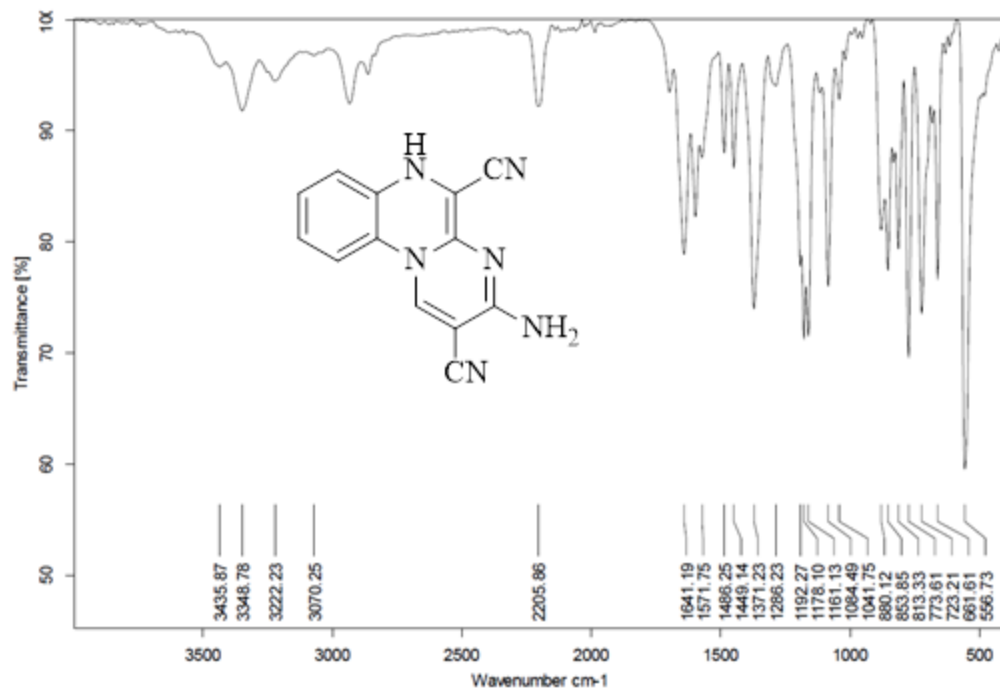

**Figure S20:** IR spectrum of compound 35

NADIA 7  
proton\_su DMSO {C:\nmr-data} Student 7

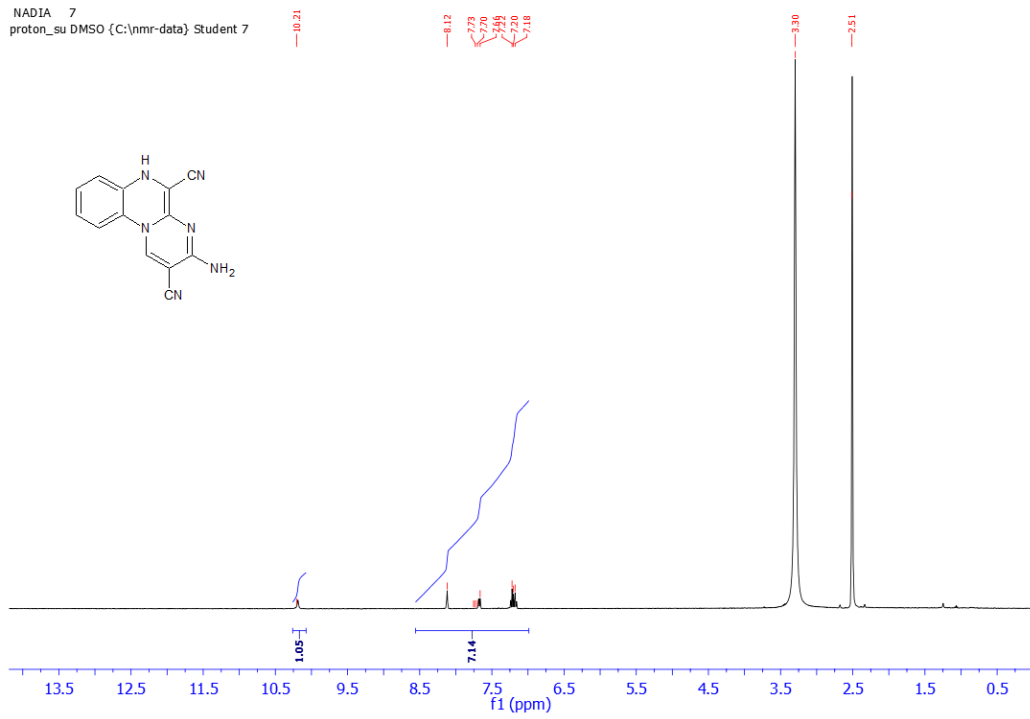

**Figure S21:**  $^1\text{H}$ NMR spectrum of compound 35

NADIA L-1  
c13\_su DMSO (C:\nmr-data) Student 24

151.71  
150.74  
146.49  
137.94  
137.66  
131.66  
130.48  
129.74  
129.40  
127.71  
119.58  
116.91

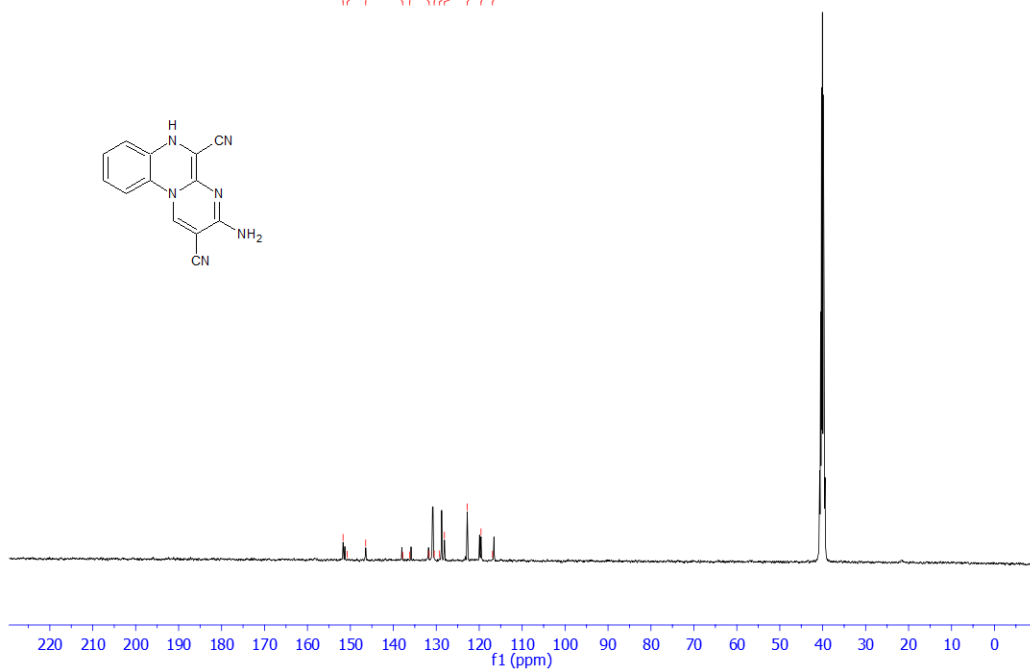

**Figure S22:**  $^{13}\text{C}$ NMR spectrum of compound 35

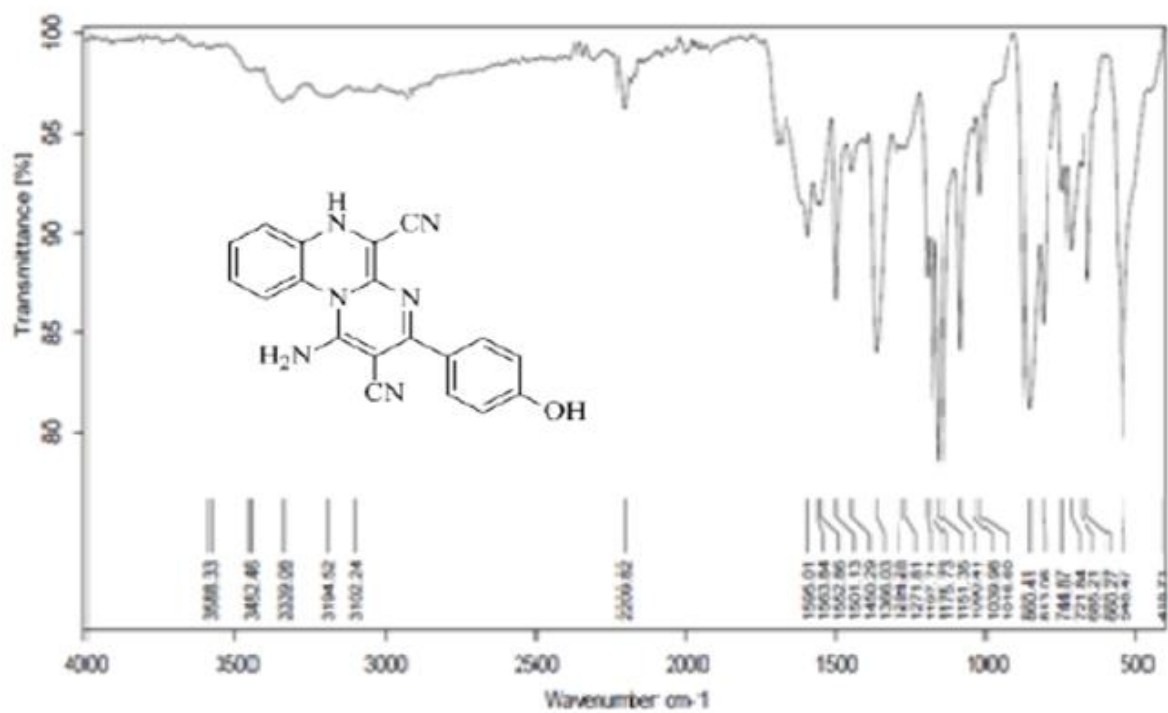

**Figure S23:**IR spectrum of compound **30**



NADIA 19  
proton\_su DMSO (C:\nmr-data) Student 21

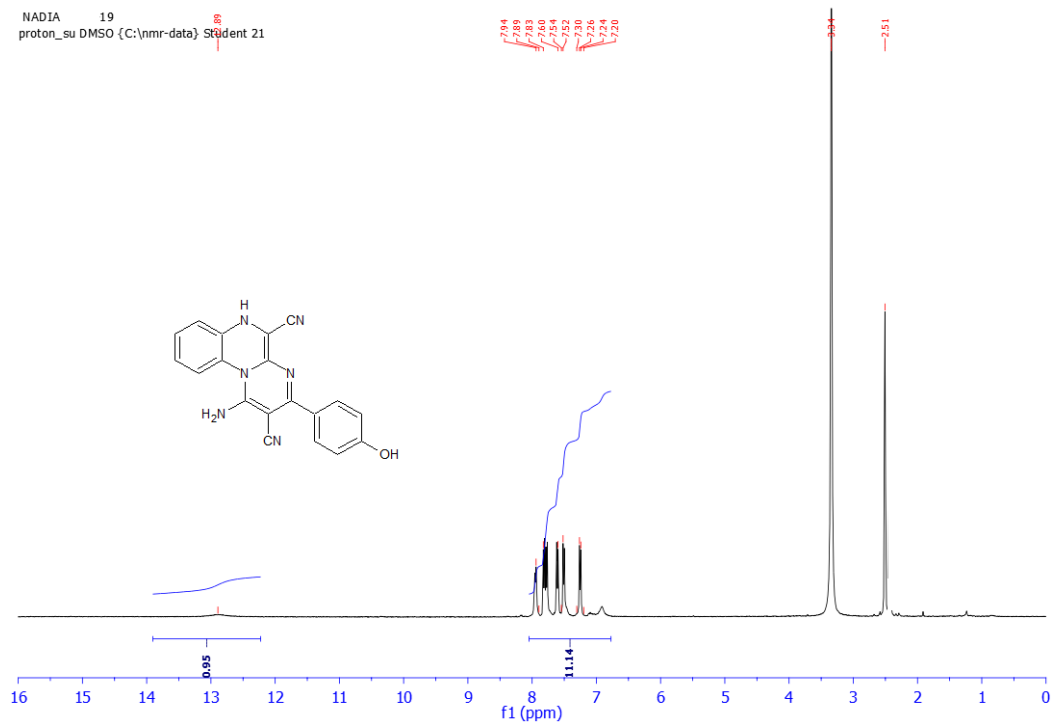

**Figure S24:** <sup>1</sup>H NMR spectrum of compound 30

NADIA -1  
c13\_su DMSO {C:\nmr-data} Student 9

156.56  
154.28  
150.32  
149.81  
146.97  
146.86  
137.91  
137.72  
133.02  
133.01  
130.81  
130.34  
128.65  
127.49  
119.82  
117.25

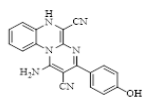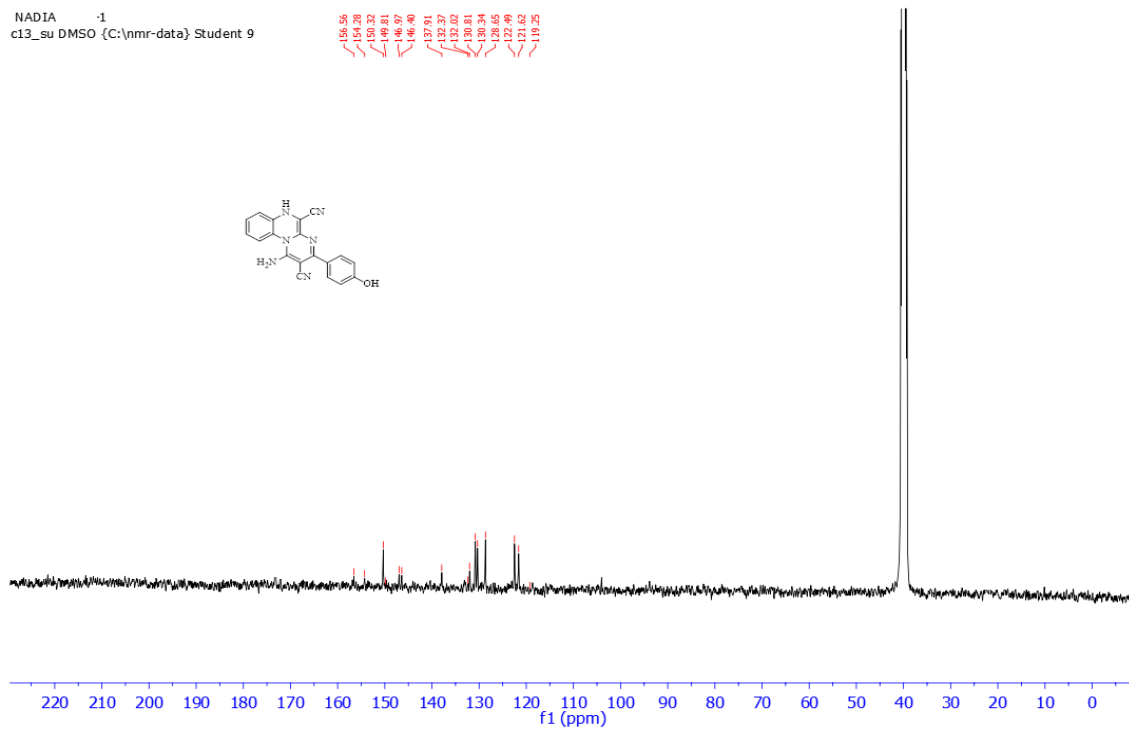

**Figure S25:**  $^{13}\text{C}$ NMR spectrum of compound **30**
